## Correction

# Correction: Personality, Relationship Conflict, and Teamwork-Related Mental Models

**The PLOS ONE Staff**

The second author's name displays incorrectly. The correct name is: Petru Lucian Curşeu. The correct citation is: Virgă D, Curşeu PL, Maricuţoiu L, Sava FA, Macsinga I, et al. (2014) Personality, Relationship Conflict, and Teamwork-Related Mental Models. PLoS ONE 9(11): e110223. doi:10.1371/journal.pone.0110223

**Reference**

1. Virgă D, Curşeu PL, Maricuţoiu L, Sava FA, Macsinga I, et al. (2014) Personality, Relationship Conflict, and Teamwork-Related Mental Models. PLoS ONE 9(11): e110223. doi:10.1371/journal.pone.0110223

---

**Citation:** The PLOS ONE Staff (2014) Correction: Personality, Relationship Conflict, and Teamwork-Related Mental Models. PLoS ONE 9(12): e116425. doi:10.1371/journal.pone.0116425

**Published:** December 23, 2014

**Copyright:** © 2014 The PLOS ONE Staff. This is an open-access article distributed under the terms of the Creative Commons Attribution License, which permits unrestricted use, distribution, and reproduction in any medium, provided the original author and source are credited.
